# Supplementary material for: Psychosocial and Financial Burden of Therapy in USA Patients with Pulmonary Arterial Hypertension
Source: MDPI journal article supplement (doi:10.3390/diseases8020022), 2020-06-13
Supplement: s1 [file s1]

Questionnaire for evaluating the financial burden of PAH therapy in PH patients at MCF

| PULMONARY ARTERIAL HYPERTENSION SURVEILLANCE QUESTIONNAIRE                                                                                                         |                          |                          |
|--------------------------------------------------------------------------------------------------------------------------------------------------------------------|--------------------------|--------------------------|
| Patient Name:                                                                                                                                                      |                          | Date of Birth:           |
| Gender:                                                                                                                                                            |                          | Date of diagnosis :      |
|                                                                                                                                                                    | Yes:                     | No:                      |
| <b><u>Questionnaire:</u></b>                                                                                                                                       |                          |                          |
| 1. Are you NOW taking any medication prescribed by a doctor for your pulmonary hypertension?                                                                       | <input type="checkbox"/> | <input type="checkbox"/> |
| If yes, which one?                                                                                                                                                 |                          |                          |
| a) Revatio (Sildenafil)                                                                                                                                            | <input type="checkbox"/> |                          |
| b) Letairis (Ambrisentan)                                                                                                                                          | <input type="checkbox"/> |                          |
| c) Adempas (Riociguat)                                                                                                                                             | <input type="checkbox"/> |                          |
| d) Uptravi (Selexipag)                                                                                                                                             | <input type="checkbox"/> |                          |
| e) Tadalafil (Addcirca)                                                                                                                                            | <input type="checkbox"/> |                          |
| f) Orenitram (oral treprostinil)                                                                                                                                   | <input type="checkbox"/> |                          |
| g) Tyvaso (inhaled treprostinil)                                                                                                                                   | <input type="checkbox"/> |                          |
| h) Pump/Infusion Remodulin (Treprostinil)                                                                                                                          | <input type="checkbox"/> |                          |
| i) Pump/Infusion Veletri (epoprostenol)                                                                                                                            | <input type="checkbox"/> |                          |
| j) More than one medication                                                                                                                                        | <input type="checkbox"/> |                          |
| k) I don't remember                                                                                                                                                | <input type="checkbox"/> |                          |
| 2. Do you have any symptoms despite taking your medication?                                                                                                        | <input type="checkbox"/> | <input type="checkbox"/> |
| If yes, what are your symptoms?                                                                                                                                    |                          |                          |
| a) Shortness of breath                                                                                                                                             | <input type="checkbox"/> |                          |
| b) Palpitation (heart racing)                                                                                                                                      | <input type="checkbox"/> |                          |
| c) Chest pain                                                                                                                                                      | <input type="checkbox"/> |                          |
| d) Lightheadedness with exertion (effort)                                                                                                                          | <input type="checkbox"/> |                          |
| e) Ankle swelling                                                                                                                                                  | <input type="checkbox"/> |                          |
| 3. Now I am going to ask you about certain medical conditions. Have you EVER been told by a doctor or other health professional that you had one of the following: |                          |                          |
| a) Heart attack                                                                                                                                                    | <input type="checkbox"/> |                          |
| b) High blood sugar (Diabetes)                                                                                                                                     | <input type="checkbox"/> |                          |
| c) Hypertension, also called high blood pressure in your arm                                                                                                       | <input type="checkbox"/> |                          |
| d) Asthma                                                                                                                                                          | <input type="checkbox"/> |                          |
| e) Chronic obstructive lung disease (emphysema)                                                                                                                    | <input type="checkbox"/> |                          |
| f) Collagen vascular disease (like Scleroderma or Lupus)                                                                                                           | <input type="checkbox"/> |                          |
| g) Sleep apnea                                                                                                                                                     | <input type="checkbox"/> |                          |
| h) Others: If yes ( )                                                                                                                                              | <input type="checkbox"/> |                          |

4. Are you satisfied with your current level of social activity?

- |                 |                          |  |
|-----------------|--------------------------|--|
| a) Not at all.  | <input type="checkbox"/> |  |
| b) A little bit | <input type="checkbox"/> |  |
| c) Somewhat     | <input type="checkbox"/> |  |
| d) Quite a bit  | <input type="checkbox"/> |  |
| e) Very much    | <input type="checkbox"/> |  |

5. Does your health now limit you in doing two hours of physical labor?

- |                 |                          |  |
|-----------------|--------------------------|--|
| a) Not at all   | <input type="checkbox"/> |  |
| b) A little bit | <input type="checkbox"/> |  |
| c) Somewhat     | <input type="checkbox"/> |  |
| d) Quite a bit  | <input type="checkbox"/> |  |
| e) Cannot do    | <input type="checkbox"/> |  |

6. Does the medication affect your mood?

|                          |                          |
|--------------------------|--------------------------|
| <input type="checkbox"/> | <input type="checkbox"/> |
|--------------------------|--------------------------|

7. Are you currently working?

|                          |                          |
|--------------------------|--------------------------|
| <input type="checkbox"/> | <input type="checkbox"/> |
|--------------------------|--------------------------|

If no, were you employed when you were diagnosed and started treatment?

|                          |                          |
|--------------------------|--------------------------|
| <input type="checkbox"/> | <input type="checkbox"/> |
|--------------------------|--------------------------|

8. How old were you when pulmonary hypertension was first diagnosed?

9. How many hours do you work per week? (escape if you aren't working)

- |                                                 |                          |  |
|-------------------------------------------------|--------------------------|--|
| a) Less than 10 hours per week                  | <input type="checkbox"/> |  |
| b) More than 10 and less than 20 hours per week | <input type="checkbox"/> |  |
| c) More than 20 and less than 30 hours per week | <input type="checkbox"/> |  |
| d) More than 30 and less than 40 hours per week | <input type="checkbox"/> |  |
| e) More than 40 hours per week                  | <input type="checkbox"/> |  |

10. How many days have you missed from work last year?

- |                                |                          |  |
|--------------------------------|--------------------------|--|
| a) Less than 10 days per year. | <input type="checkbox"/> |  |
| b) 10-20 days per year.        | <input type="checkbox"/> |  |
| c) 20-30 days per year.        | <input type="checkbox"/> |  |
| d) >30 days per year.          | <input type="checkbox"/> |  |
| e) I don't know                | <input type="checkbox"/> |  |

11. Did you have health/medical insurance at the time of diagnosis?

|                          |                          |
|--------------------------|--------------------------|
| <input type="checkbox"/> | <input type="checkbox"/> |
|--------------------------|--------------------------|

If yes, which one?

- |             |                          |  |
|-------------|--------------------------|--|
| a) Private  | <input type="checkbox"/> |  |
| b) Medicare | <input type="checkbox"/> |  |
| c) Medicaid | <input type="checkbox"/> |  |
| d) Other    | <input type="checkbox"/> |  |

|                                                                                                                          |                          |                          |
|--------------------------------------------------------------------------------------------------------------------------|--------------------------|--------------------------|
| 12. Did you have health/medical insurance that covers your pharmacy cost at the time of diagnosis?                       | <input type="checkbox"/> | <input type="checkbox"/> |
| If yes, which one?                                                                                                       |                          |                          |
| e) Private                                                                                                               | <input type="checkbox"/> |                          |
| f) Medicare                                                                                                              | <input type="checkbox"/> |                          |
| g) Medicaid                                                                                                              | <input type="checkbox"/> |                          |
| h) Other                                                                                                                 | <input type="checkbox"/> |                          |
| 13. Did you have out of pocket expenses at that time?                                                                    | <input type="checkbox"/> | <input type="checkbox"/> |
| 14. Does your health insurance still cover the expenses of pulmonary hypertension?                                       | <input type="checkbox"/> | <input type="checkbox"/> |
| 15. Does your health insurance still cover the expenses of pulmonary hypertension medications?                           | <input type="checkbox"/> | <input type="checkbox"/> |
| 16. Do you feel that the out of pocket medications expenses are affordable??                                             | <input type="checkbox"/> | <input type="checkbox"/> |
| 17. Have you applied for disability?                                                                                     | <input type="checkbox"/> | <input type="checkbox"/> |
| If yes, is it related to the pulmonary hypertension?                                                                     | <input type="checkbox"/> | <input type="checkbox"/> |
| 18. What are your monthly out of pocket expenses at this time for PH therapy?                                            |                          |                          |
| a) Less than \$ 1000 per month.                                                                                          | <input type="checkbox"/> |                          |
| b) >\$1000- <2000 per month                                                                                              | <input type="checkbox"/> |                          |
| c) >\$2000- <3000 per month                                                                                              | <input type="checkbox"/> |                          |
| d) >\$3000- <4000 per month                                                                                              | <input type="checkbox"/> |                          |
| e) More than \$4000 per month                                                                                            | <input type="checkbox"/> |                          |
| f) I don't know                                                                                                          | <input type="checkbox"/> |                          |
| 19. DURING THE PAST 12 MONTHS, How have your out of pocket expenses changed with different medications?                  |                          |                          |
| a) Didn't change.                                                                                                        | <input type="checkbox"/> |                          |
| b) Affected your daily lifestyle.                                                                                        | <input type="checkbox"/> |                          |
| c) I don't know                                                                                                          | <input type="checkbox"/> |                          |
| d) Other                                                                                                                 | <input type="checkbox"/> |                          |
| 20. DURING THE PAST 12 MONTHS, were any of the following true for you regarding your pulmonary hypertension medications? | <input type="checkbox"/> |                          |
| a) You took less medicine to save money.                                                                                 | <input type="checkbox"/> |                          |
| b) You skipped medication doses to save money.                                                                           | <input type="checkbox"/> |                          |
| c) You delayed filling a prescription to save money.                                                                     | <input type="checkbox"/> |                          |
| d) You asked your doctor for a lower cost medication to save money.                                                      | <input type="checkbox"/> |                          |
| e) You bought prescription drugs from another country to save money.                                                     | <input type="checkbox"/> |                          |
| f) You used alternative therapies to save money.                                                                         | <input type="checkbox"/> |                          |
| 21. Were you forced to change your medication because of the financial hardship?                                         | <input type="checkbox"/> | <input type="checkbox"/> |

22. How frequently did you miss the drug dosages?

- a) I don't miss any drug dosages. ☐
- b) Daily ☐
- c) Once per week ☐
- d) Once per month ☐
- e) I don't know ☐

23. Do you have additional financial support for the expenses of pulmonary hypertension?

☐ ☐

If yes, from whom?

- a) Nonprofit organization (like Caring Voice Coalition) ☐
- b) Pharmaceutical company assistance program ☐
- c) Relatives/Friends ☐
- d) Other ☐

24. Were there any time when you needed a follow-up care, but didn't get it because you couldn't afford it?

- a) Yes ☐
- b) No ☐
- c) Don't know ☐
- d) Refused ☐

25. In regard to your health insurance or health care coverage, how does it compare to a year ago?

- a. Better ☐
- b) Worse ☐
- c) About the same ☐
- d) Don't know ☐
- e) Refused ☐

**Name of patient:**

**Date:**

**Signature of investigator :**

**Date:**
